# Supplementary material
Source: Springer Nature journal article supplement (https://www.springermedizin.de/resource/supplementary/12974_2010_273_MOESM4_ESM.pdf/9601138)

**A**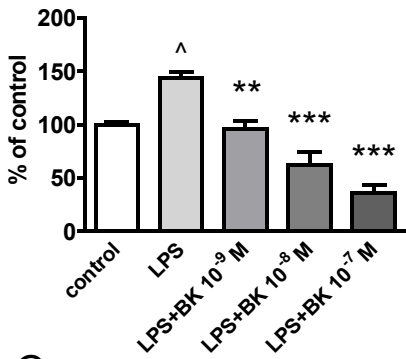**B**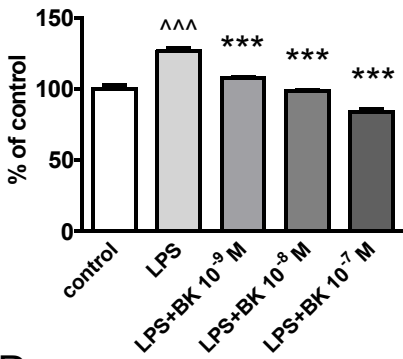**C**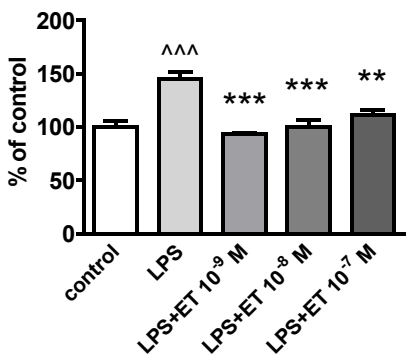**D**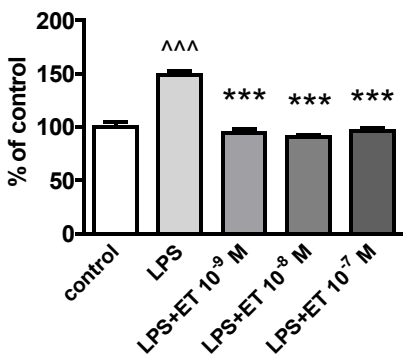**E**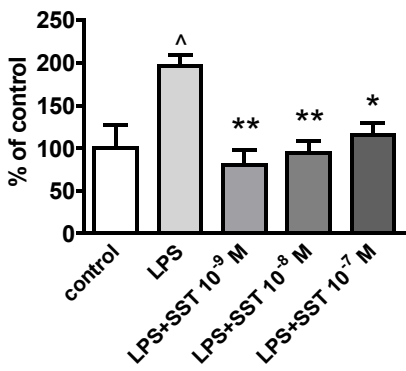**F**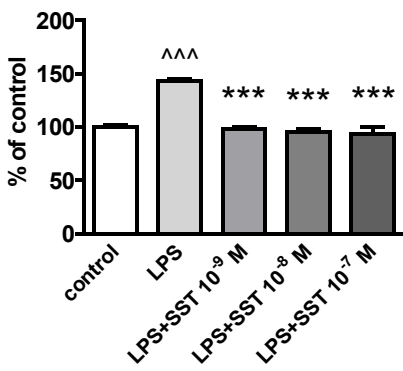

Supplement: MOESM4 [file 9601138]
